# Supplementary material for: Immunostimulatory Effects of Live Lactobacillus sakei K040706 on the CYP-Induced Immunosuppression Mouse Model
Source: Nutrients. 2020 Nov 22;12(11):3573. doi: 10.3390/nu12113573 (PMC7700367; doi:10.3390/nu12113573)
Supplement: Supplementary file 1 [file nutrients-12-03573-s001.pdf]

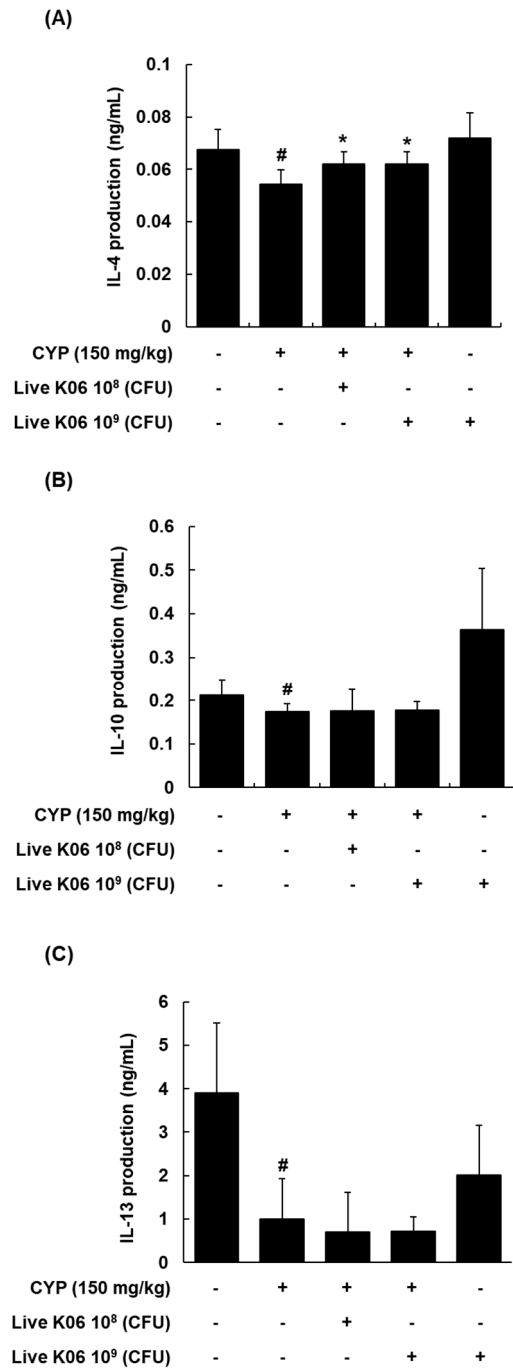

**Figure S1.** Effects of live K040706 on the production of IL-4, IL-10, and IL-13 in splenocytes of CYP-treated mice. (A-C) Splenocytes were obtained and treated with Con A for 48 h. After incubation, the culture supernatant was collected and analyzed for IL-4, IL-10, and IL-13 production by ELISA. Data are presented as the mean  $\pm$  SD of 10 mice. <sup>#</sup> $p < 0.05$  vs vehicle-treated mice; <sup>\*</sup> $p < 0.05$  vs CYP-treated mice.

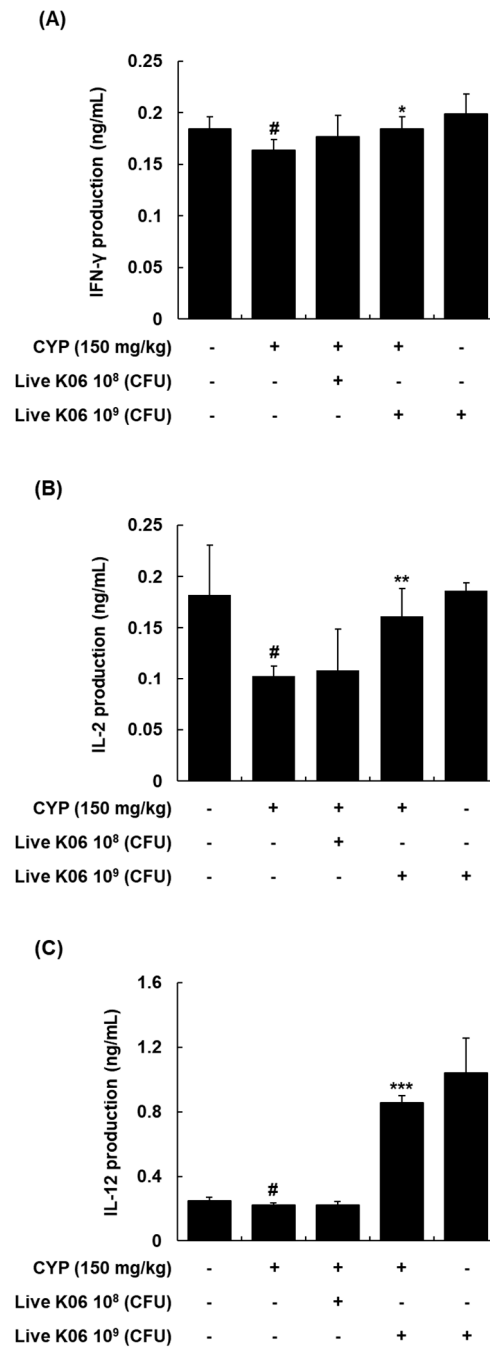

**Figure S2.** Effects of live K040706 on the production of IFN- $\gamma$ , IL-2, and IL-12 in Peyer's patch of CYP-treated mice. (A-C) Isolated Peyer's patch cells were obtained and treated with Con A for 48 h. After incubation, the culture supernatant was collected and analyzed for IFN- $\gamma$ , IL-2, and IL-12 production by ELISA. Data are presented as the mean  $\pm$  SD of 10 mice. <sup>#</sup> $p < 0.05$  vs vehicle-treated mice; <sup>\*</sup> $p < 0.05$ , <sup>\*\*</sup> $p < 0.01$ , and <sup>\*\*\*</sup> $p < 0.001$  vs CYP -treated mice.
